# Supplementary material for: Effect of spatiotemporal variables on abundance, biting activity and parity of Nyssorhynchus darlingi (Diptera: Culicidae) in peri-Iquitos, Peru
Source: PubMed Central journal article supplement (PMC11031940; doi:10.1186/s12936-024-04940-z), 2024-04-19
Supplement: 12936_2024_4940_MOESM2_ESM.pdf [file 12936_2024_4940_MOESM2_ESM.pdf]

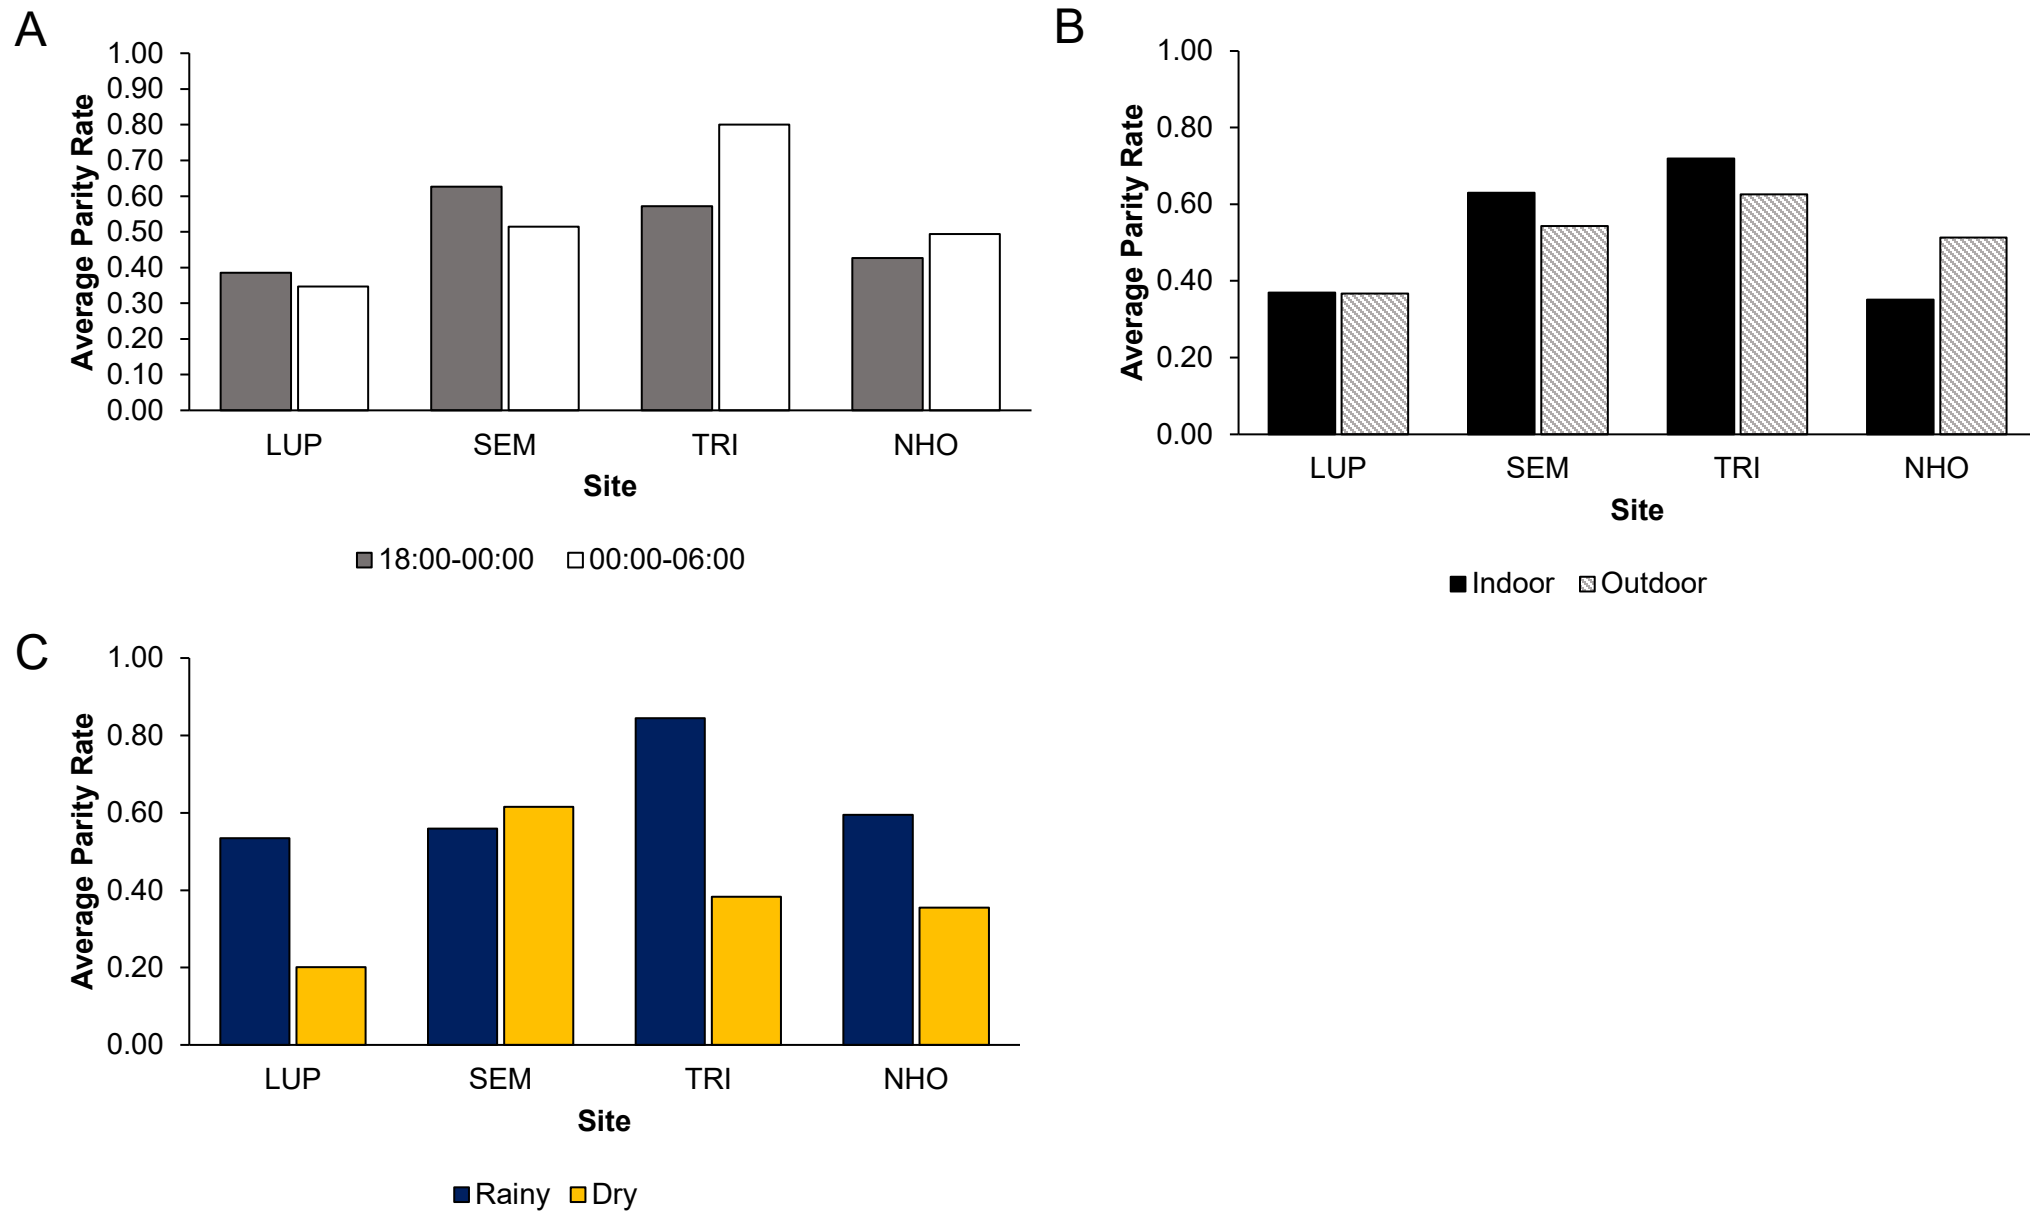

**Figure S1.** Average parity rate for each collection site comparing: A) Before vs. after midnight collections; B) Indoor vs. outdoor collections; C) Rainy vs. dry collections.

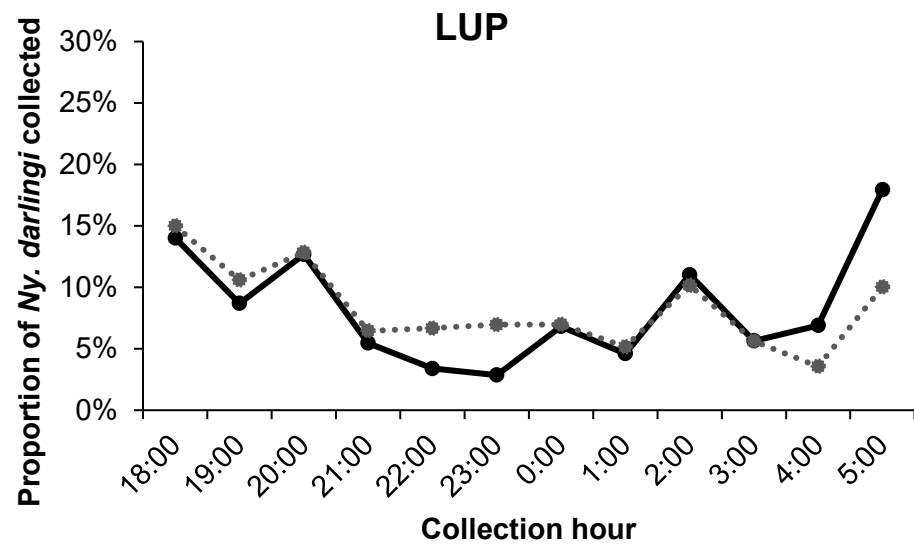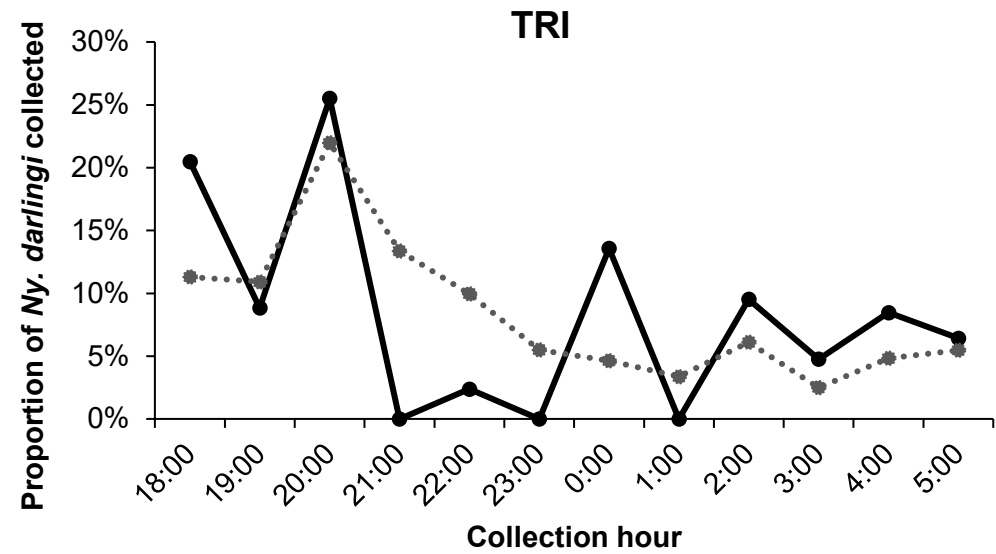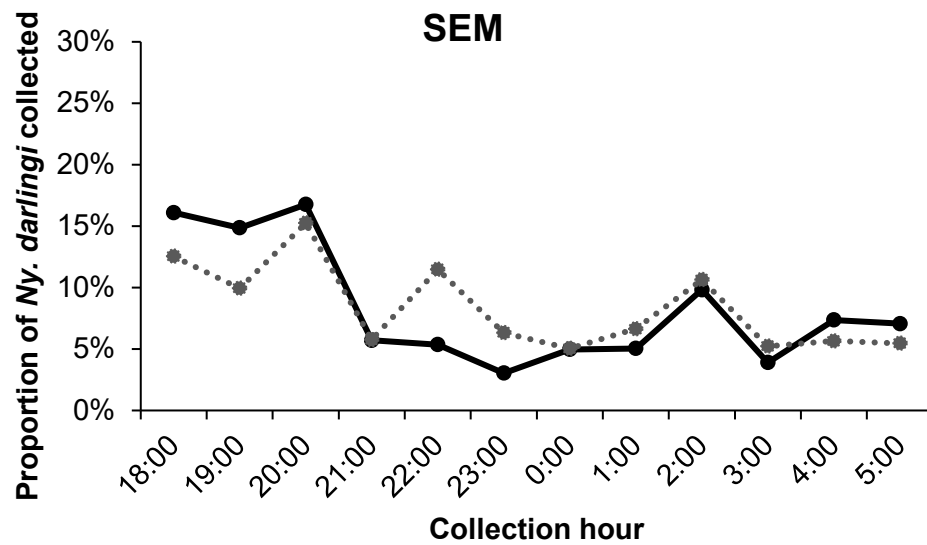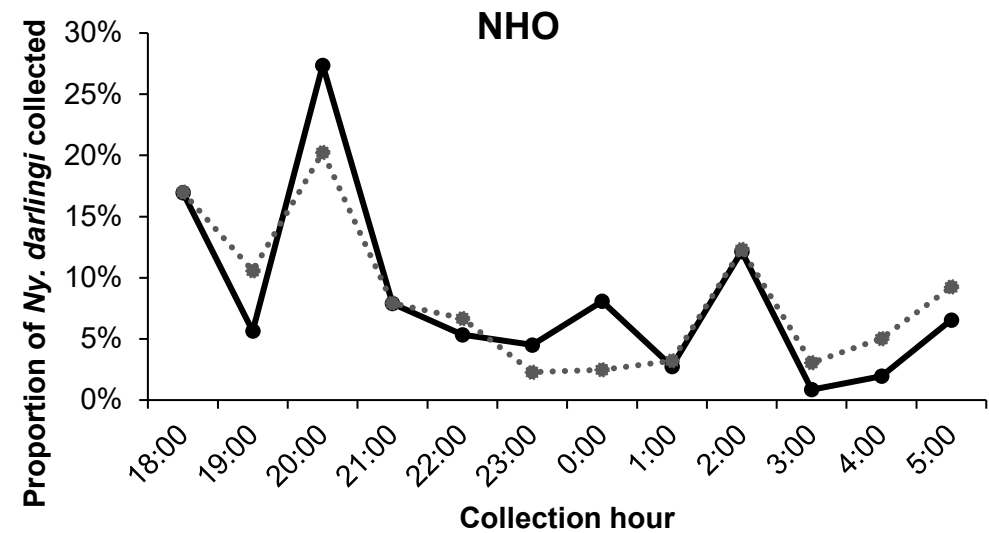

**Figure S2.** Average proportion of *Ny. darlingi* collected hourly, biting indoor (solid black line) vs. outdoor (gray dotted line) for each collection site. Confidence intervals not shown (for clarity).

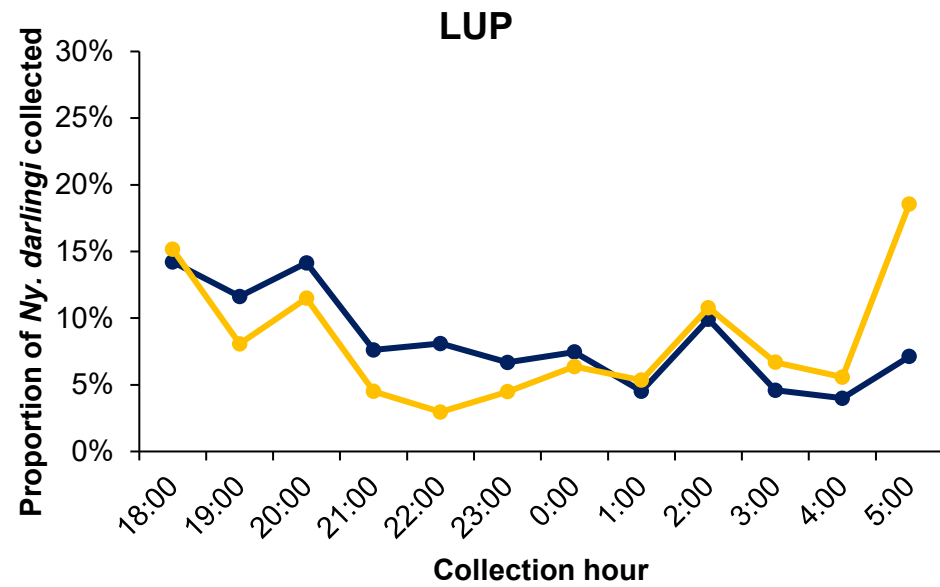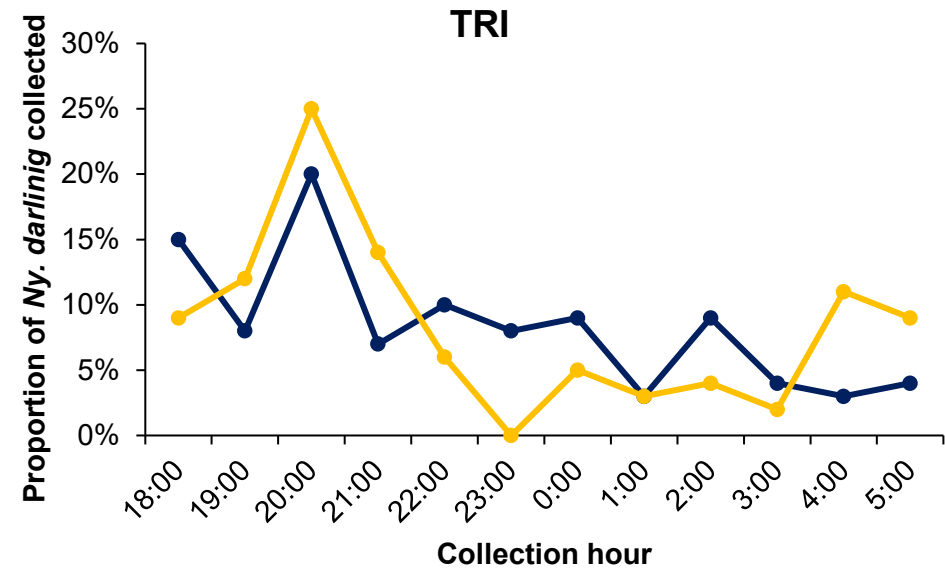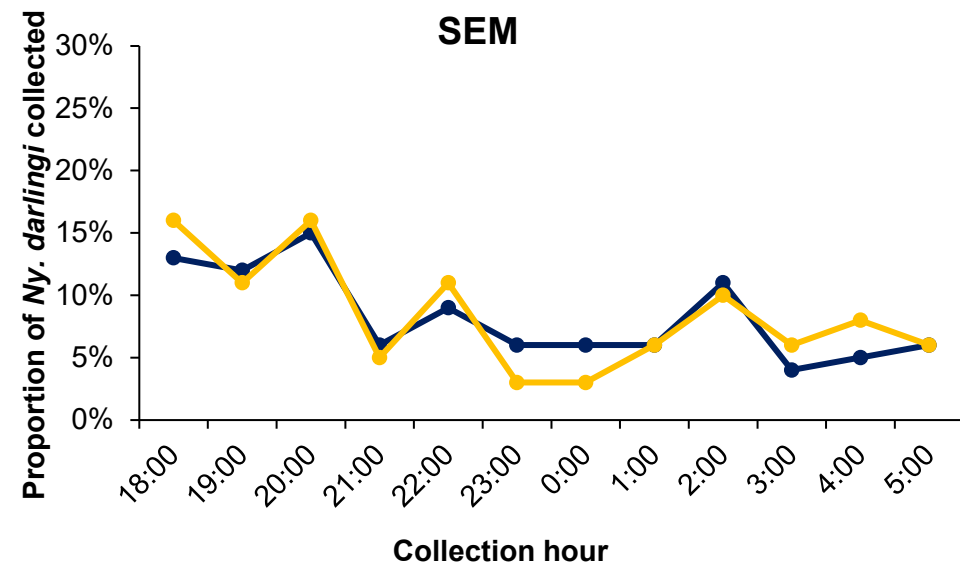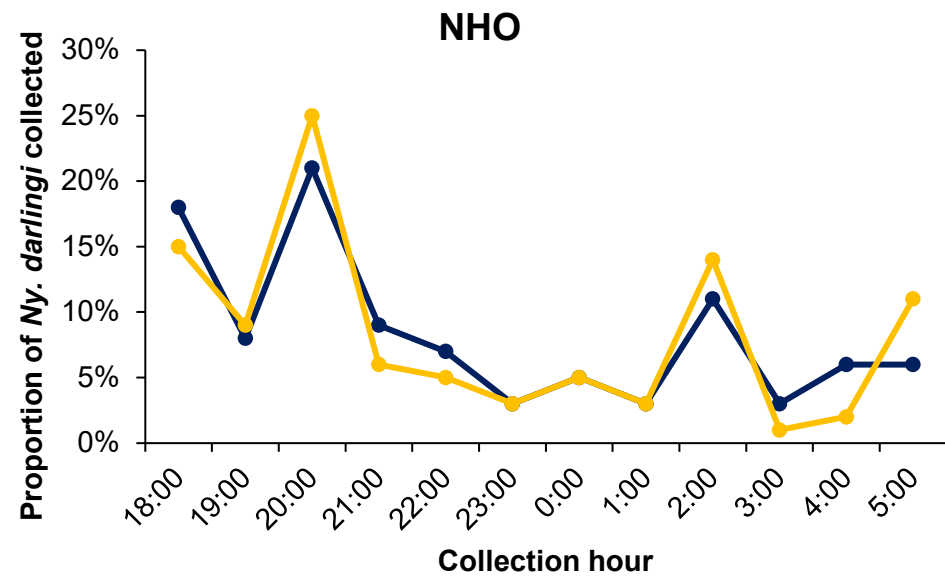

**Figure S3.** Average proportion of *Ny. darlingi* collected hourly, by season (blue: rainy; yellow: dry) for each collection site. Confidence intervals not shown (for clarity).

**Table S1.** Kruskal-Wallis analysis on ranked abundance of *Nyssorhynchus darlingi*, in four collection sites (Lupuna, Nuevo Horizonte, Santa Emilia, El Triunfo), during rainy and dry seasons 2016-2017.

| <b>Variable</b>                     | <b>Degrees of freedom</b> | <b>F-value</b> | <b>p value</b> |
|-------------------------------------|---------------------------|----------------|----------------|
| Season                              | 1                         | 385.34         | < 0.0001       |
| Site                                | 3                         | 390.92         | < 0.0001       |
| Indoor/outdoor                      | 1                         | 145.20         | < 0.0001       |
| Time period                         | 3                         | 52.29          | < 0.0001       |
| Season x site                       | 3                         | 31.80          | < 0.0001       |
| Season x indoor/outdoor             | 1                         | 3.90           | 0.0486         |
| Season x time period                | 3                         | 6.347          | 0.0003         |
| Site x time period                  | 9                         | 3.685          | 0.0002         |
| Indoor/outdoor x time period        | 3                         | 3.66           | 0.0122         |
| Season x site x indoor/outdoor      | 6                         | 2.448          | 0.0238         |
| Site x indoor/outdoor x time period | 9                         | 2.13           | 0.0253         |
